# Supplementary material
Source: PubMed Central journal article supplement (PMC3064719)
Supplement: NIHMS275817-supplement-01.pdf [file NIHMS275817-supplement-01.pdf]

| <b>HPLC analysis of chronic unpredictable stress effects on monoamine levels</b> |              |            |                   |              |            |                    |
|----------------------------------------------------------------------------------|--------------|------------|-------------------|--------------|------------|--------------------|
|                                                                                  | <b>DOPAC</b> | <b>DA</b>  | <b>DOPAC / DA</b> | <b>5HIAA</b> | <b>5HT</b> | <b>5HIAA / 5HT</b> |
| <b>Hypothalamus</b>                                                              |              |            |                   |              |            |                    |
| <b>Control</b>                                                                   | 0.03±0.01    | 0.18±0.01  | 0.14±0.03         | 0.57±0.04    | 0.49±0.02  | 1.17±0.08          |
| <b>CUS</b>                                                                       | 0.06±0.01    | 0.29±0.10  | 0.24±0.05         | 0.81±0.06*   | 0.51±0.03  | 1.61±0.14*         |
| <b>Amygdala</b>                                                                  |              |            |                   |              |            |                    |
| <b>Control</b>                                                                   | 0.04±0.01    | 0.21±0.04  | 0.20±0.02         | 0.53±0.05    | 0.79±0.10  | 0.71±0.04          |
| <b>CUS</b>                                                                       | 0.04±0.01    | 0.24±0.03  | 0.16±0.04         | 0.54±0.05    | 0.83±0.11  | 0.69±0.06          |
| <b>Dorsal Posterior Striatum</b>                                                 |              |            |                   |              |            |                    |
| <b>Control</b>                                                                   | 1.09±0.10    | 10.98±1.18 | 0.10±0.00         | 0.68±0.04    | 1.03±0.11  | 0.69±0.06          |
| <b>CUS</b>                                                                       | 0.99±0.17    | 9.09±1.54  | 0.11±0.00         | 0.74±0.05    | 1.10±0.11  | 0.71±0.07          |
| <b>Nucleus Accumbens</b>                                                         |              |            |                   |              |            |                    |
| <b>Control</b>                                                                   | 1.52±0.25    | 10.65±1.58 | 0.14±0.02         | 0.97±0.06    | 1.12±0.06  | 0.88±0.06          |
| <b>CUS</b>                                                                       | 1.51±0.18    | 10.74±0.89 | 0.14±0.01         | 0.92±0.07    | 1.05±0.09  | 0.91±0.08          |
| <b>Cingulate Cortex</b>                                                          |              |            |                   |              |            |                    |
| <b>Control</b>                                                                   | ND           | 0.10±0.02  | ND                | 0.36±0.03    | 0.28±0.02  | 1.29±0.05          |
| <b>CUS</b>                                                                       |              | 0.06±0.01  |                   | 0.31±0.02    | 0.25±0.01  | 1.28±0.08          |
| <b>Medial Prefrontal Cortex</b>                                                  |              |            |                   |              |            |                    |
| <b>Control</b>                                                                   | 0.05±0.00    | 0.18±0.02  | 0.31±0.02         | 0.37±0.03    | 0.84±0.12  | 0.46±0.03          |
| <b>CUS</b>                                                                       | 0.05±0.01    | 0.14±0.03  | 0.32±0.04         | 0.38±0.04    | 0.83±0.13  | 0.49±0.04          |

All data were analyzed by High Pressure Liquid Chromatography (HPLC) and are presented as means ± SEM and were analyzed by an independent two-tailed t-test; \*p < 0.05 when compared to the controls. CUS = chronic unpredictable stress. ND = Not detectable; values were below accurate detection in specified brain region.
